# Supplementary material for: Analysis of Terpene Synthase Family Genes in Camellia sinensis with an Emphasis on Abiotic Stress Conditions
Source: PubMed Central journal article supplement (PMC6976640; doi:10.1038/s41598-020-57805-1), 2020-01-22
Supplement: 41598_2020_57805_MOESM1_ESM.pdf [file 41598_2020_57805_MOESM1_ESM.pdf]

# **Analysis of Terpene Synthase Family Genes in *Camellia sinensis* with an Emphasis on Abiotic Stress Conditions**

**Han-Chen Zhou<sup>1,2#</sup>, Lubobi Ferdinand Shamala<sup>1#</sup>, Xing-Kai Yi<sup>1,3</sup>, Zhen Yan<sup>1</sup>,  
Shu Wei<sup>1\*</sup>**

<sup>1</sup>State Key Laboratory of Tea Plant Biology and Utilization, Anhui Agricultural University, Hefei, China

<sup>2</sup>Tea Research Institute, Anhui Academy of Agricultural Sciences, Huangshan, China

<sup>3</sup>Horticultural Institute, Anhui Academy of Agricultural Sciences, Hefei, China

**\* Correspondence:**

Shu Wei

[weishu@ahau.edu.cn](mailto:weishu@ahau.edu.cn)

Supplementary Information

Supplementary Table S1 Primer for tea TPS genes analysis

| Gene Name | Primer for qRT-PCR                                         |
|-----------|------------------------------------------------------------|
| CsTPS01   | F:CATCCTACCATTTGGGGAGATCATT<br>R:GCTGATCATTAGCTGCCACTAGCAT |
| CsTPS02   | F:TCACTCGACGCTCAGCCAATTATCA<br>R:TGGATTGCATCGATGAAGTTCAGTT |
| CsTPS03   | F:CACATCTCAGGATGCGAGGAGAAGA<br>R:AATGGATGGGCTGATTCAGAGCATG |
| CsTPS22   | F:AGGAATGCCCAGATTAGAGGCCAGG<br>R:TGGTGCAACCTTTGTAAAAGATTGA |
| CsTPS23   | F:TGAGGTGAGAGGGATGCTACGTGAT<br>R:TCATCATCATCACCACCACCACCAC |
| CsTPS29   | F:CCTACTCGCCACTTGGCCAAATTTC<br>R:CGGCTACCACCATGCTCCTCACTTG |
| CsTPS42   | F:TAGAGAAGCTGGAGGAGCCATTGGA<br>R:GCGCCAATTCATTTTGTGATCAATA |
| CsTPS43   | F:TTCAAGTGAATCCACGACGATCAGC<br>R:ATTCAACTCTTCTAATTTGGTCCCA |
| CsTPS51   | F:CTTTAGGCTCCTCAGGCAGCATGGA<br>R:AGGCTTCAAGAAGCTCAAGCATTGC |
| CsTPS73   | F:TTTCCCCATCTGCCTATGACACTGC<br>R:ACCATCATTGCCAACTTCACCCCAA |
| CsTPS76   | F:TAACGGTTTGATGCCACATCTTTCT<br>R:CCGTGTCTTTCCACCACTTTGATAC |
| CsTPS77   | F:GCAAGAAGGGTACAATGTGCCCGCG<br>R:CTGCGGCTTGATCAAGAATGTCTTC |
| CsTPS78   | F:AGGCATTGATTACCACTTCCGGGAG<br>R:GCACATTGTAGCCTTGTTGCCTCAA |
| CsTPS79   | F:CATGATCGATGCCCTCCAACG<br>R:GTTGCCTCAACAGACGAAAGCGA       |

Supplementary Table S2. Identification of tea TPS gene family in CSS genome

| NO. | Name    | Gene ID     | Location                       | Protein(aa) | Nucleotide(bp) | Exon | Pfam analysis     | SWISS PROT Annotation                      | TPS sub-family |
|-----|---------|-------------|--------------------------------|-------------|----------------|------|-------------------|--------------------------------------------|----------------|
| 1   | CsTPS01 | TEA032539.1 | Scaffold2014:1796883:1802367:- | 567         | 1704           | 7    | PF01397 / PF03936 | TPSGD_VITVI, (-)-<br>germacrene D synthase | TPS-a          |
| 2   | CsTPS02 | TEA029356.1 | Scaffold559:448741:453375:+    | 537         | 1614           | 7    | PF01397 / PF03936 | TPSGD_VITVI, (-)-<br>germacrene D synthase | TPS-a          |
| 3   | CsTPS03 | TEA014184.1 | Scaffold2694:466713:471430:-   | 569         | 1710           | 7    | PF01397 / PF03936 | TPSGD_VITVI, (-)-<br>germacrene D synthase | TPS-a          |
| 4   | CsTPS04 | TEA031969.1 | Scaffold982:939616:948654:+    | 1042        | 3129           | 8    | PF01397 / PF03936 | TPSGD_VITVI, (-)-<br>germacrene D synthase | TPS-a          |
| 5   | CsTPS05 | TEA031966.1 | Scaffold982:979330:981825:+    | 441         | 1326           | 5    | PF01397 / PF03936 | TPSGD_VITVI, (-)-<br>germacrene D synthase | TPS-a          |
| 6   | CsTPS06 | TEA025177.1 | Scaffold7725:83168:89037:+     | 624         | 1875           | 9    | PF01397 / PF03936 | TPSGD_VITVI, (-)-<br>germacrene D synthase | TPS-a          |
| 7   | CsTPS07 | TEA010895.1 | Scaffold1955:1632511:1641345:+ | 559         | 1680           | 8    | PF01397 / PF03936 | TPSGD_VITVI, (-)-<br>germacrene D synthase | TPS-a          |
| 8   | CsTPS08 | TEA005128.1 | Scaffold1857:381589:396451:-   | 265         | 798            | 4    | PF03936           | TPSGD_VITVI, (-)-<br>germacrene D synthase | TPS-a          |
| 9   | CsTPS09 | TEA017888.1 | Scaffold5016:408273:412431:-   | 373         | 1122           | 5    | PF03936           | TPSGD_VITVI, (-)-<br>germacrene D synthase | TPS-a          |
| 10  | CsTPS10 | TEA032538.1 | Scaffold2014:1849901:1856947:- | 432         | 1299           | 6    | PF01397 / PF03936 | TPSGD_VITVI, (-)-<br>germacrene D synthase | TPS-a          |
| 11  | CsTPS11 | TEA005117.1 | Scaffold1857:396807:397525:-   | 195         | 588            | 1    | PF01397           | TPSGD_VITVI, (-)-<br>germacrene D synthase | TPS-a          |
| 12  | CsTPS12 | TEA022784.1 | Scaffold1059:445091:449726:-   | 385         | 1158           | 6    | PF01397           | TPSGD_VITVI, (-)-<br>germacrene D synthase | TPS-a          |
| 13  | CsTPS13 | TEA021924.1 | Scaffold1039:738385:745242:+   | 301         | 906            | 6    | PF03936           | TPSGD_VITVI, (-)-<br>germacrene D synthase | TPS-a          |
| 14  | CsTPS14 | TEA017878.1 | Scaffold5016:412689:414195:-   | 280         | 843            | 3    | PF01397           | TPSGD_VITVI, (-)-<br>germacrene D synthase | TPS-a          |
| 15  | CsTPS15 | TEA002287.1 | Scaffold569:2037188:2039624:+  | 315         | 948            | 4    | PF01397 / PF03936 | TPSGD_VITVI, (-)-<br>germacrene D synthase | TPS-a          |
| 16  | CsTPS16 | TEA017309.1 | Scaffold4032:135383:138230:-   | 207         | 624            | 3    | PF03936           | TPSGD_VITVI, (-)-<br>germacrene D synthase | TPS-a          |
| 17  | CsTPS17 | TEA033098.1 | Scaffold5126:880963:886581:-   | 185         | 558            | 3    | PF01397           | TPSGD_VITVI, (-)-<br>germacrene D synthase | TPS-a          |
| 18  | CsTPS18 | TEA029355.1 | Scaffold559:506685:510183:+    | 207         | 624            | 2    | PF01397           | TPSGD_VITVI, (-)-<br>germacrene D synthase | TPS-a          |
| 19  | CsTPS19 | TEA031961.1 | Scaffold982:978097:979246:+    | 186         | 561            | 2    | PF01397           | TPSGD_VITVI, (-)-<br>germacrene D synthase | TPS-a          |

|    |         |             |                                |     |      |    |                   |                                                      |       |
|----|---------|-------------|--------------------------------|-----|------|----|-------------------|------------------------------------------------------|-------|
| 20 | CsTPS20 | TEA029353.1 | Scaffold559:545565:545945:+    | 126 | 381  | 1  | PF03936           | TPSGD_VITVI, (-)-germacrene D synthase               | TPS-a |
| 21 | CsTPS21 | TEA029348.1 | Scaffold559:382474:391211:+    | 730 | 2193 | 10 | PF01397 / PF03936 | TPSGD_VITVI, (-)-germacrene D synthase               | TPS-a |
| 22 | CsTPS22 | TEA012463.1 | Scaffold1840:218881:222925:-   | 547 | 1644 | 7  | PF01397 / PF03936 | TPSGD_VITVI, (-)-germacrene D synthase               | TPS-a |
| 23 | CsTPS23 | TEA023168.1 | Scaffold485:499764:506329:+    | 540 | 1623 | 7  | PF01397 / PF03936 | TPSGD_VITVI, (-)-germacrene D synthase               | TPS-a |
| 24 | CsTPS24 | TEA017886.1 | Scaffold5016:315868:326381:-   | 527 | 1584 | 7  | PF01397 / PF03936 | TPSGD_VITVI, (-)-germacrene D synthase               | TPS-a |
| 25 | CsTPS25 | TEA010551.1 | Scaffold1188:1285004:1291162:- | 839 | 2520 | 7  | PF01397 / PF03936 | TPSGD_VITVI, (-)-germacrene D synthase               | TPS-a |
| 26 | CsTPS26 | TEA003774.1 | Scaffold5587:3985:6273:-       | 367 | 1104 | 5  | PF03936           | TPSGD_VITVI, (-)-germacrene D synthase               | TPS-a |
| 27 | CsTPS27 | TEA005096.1 | Scaffold1857:406724:409024:-   | 131 | 396  | 2  | PF01397           | TPSGD_VITVI, (-)-germacrene D synthase               | TPS-a |
| 28 | CsTPS28 | TEA005082.1 | Scaffold10509:51897:63536:-    | 399 | 1356 | 6  | PF01397 / PF03936 | TPSGD_VITVI, (-)-germacrene D synthase               | TPS-a |
| 29 | CsTPS29 | TEA024081.1 | Scaffold1689:579330:586136:-   | 541 | 1626 | 7  | PF01397 / PF03936 | TPS32_SOLLC, Viridiflorene synthase                  | TPS-a |
| 30 | CsTPS30 | TEA007878.1 | Scaffold23:868027:874480:+     | 487 | 1464 | 6  | PF01397 / PF03936 | TPS32_SOLLC, Viridiflorene synthase                  | TPS-a |
| 31 | CsTPS31 | TEA027025.1 | Scaffold228:1416204:1431743:-  | 338 | 1017 | 5  | PF01397           | TPS32_SOLLC, Viridiflorene synthase                  | TPS-a |
| 32 | CsTPS32 | TEA021499.1 | Scaffold626:560395:570357:+    | 435 | 1308 | 7  | PF01397 / PF03936 | TPS32_SOLLC, Viridiflorene synthase                  | TPS-a |
| 33 | CsTPS33 | TEA010904.1 | Scaffold1955:1784442:1785892:+ | 285 | 855  | 5  | PF01397 / PF03936 | TPSVS_VITVI, Valencene synthase                      | TPS-a |
| 34 | CsTPS34 | TEA017307.1 | Scaffold4032:138287:144440:-   | 223 | 672  | 3  | PF01397 / PF03936 | TPSVS_VITVI, Valencene synthase                      | TPS-a |
| 35 | CsTPS35 | TEA027070.1 | Scaffold228:1596311:1599132:-  | 186 | 561  | 5  | PF01397           | 5EAS4_NICAT, Probable 5-epi-aristolochene synthase 4 | TPS-a |
| 36 | CsTPS36 | TEA027061.1 | Scaffold228:1547137:1548048:-  | 174 | 525  | 3  | PF03936           | TPS1_RICCO, Alpha-copaene synthase                   | TPS-a |
| 37 | CsTPS37 | TEA009449.1 | Scaffold1786:1345647:1360438:- | 595 | 1788 | 7  | PF01397 / PF03936 | ATESY_VITVI, (-)-alpha-terpineol synthase            | TPS-b |
| 38 | CsTPS38 | TEA023157.1 | Scaffold2616:240593:250372:-   | 500 | 1503 | 6  | PF01397 / PF03936 | ATESY_VITVI, (-)-alpha-terpineol synthase            | TPS-b |
| 39 | CsTPS39 | TEA009450.1 | Scaffold1786:1406070:1450966:- | 236 | 711  | 3  | PF03936           | TPS10_RICCO, Terpene synthase 10                     | TPS-b |
| 40 | CsTPS40 | TEA017654.1 | Scaffold285:1744284:1744859:+  | 153 | 462  | 3  | PF01397           | ATESY_VITVI, (-)-alpha-terpineol synthase            | TPS-b |
| 41 | CsTPS41 | TEA032709.1 | Scaffold1618:391002:404626:+   | 599 | 1800 | 8  | PF01397 / PF03936 | ATESY_VITVI, (-)-alpha-terpineol synthase            | TPS-b |

|    |         |             |                                |     |      |   |                   |                                                     |       |
|----|---------|-------------|--------------------------------|-----|------|---|-------------------|-----------------------------------------------------|-------|
| 42 | CsTPS42 | TEA002963.1 | Scaffold2253:770954:781331:+   | 568 | 1707 | 7 | PF01397 / PF03936 | ATESY_VITVI, (-)-alpha-terpineol synthase           | TPS-b |
| 43 | CsTPS43 | TEA014987.1 | Scaffold5359:390672:398897:+   | 607 | 1824 | 7 | PF01397 / PF03936 | TPS9_RICCO, Probable terpene synthase 9             | TPS-b |
| 44 | CsTPS44 | TEA032731.1 | Scaffold1618:216308:232484:+   | 583 | 1752 | 7 | PF01397 / PF03936 | ATESY_VITVI, (-)-alpha-terpineol synthase           | TPS-b |
| 45 | CsTPS45 | TEA030379.1 | Scaffold300:536240:539893:-    | 473 | 1472 | 6 | PF01397 / PF03936 | ATESY_VITVI, (-)-alpha-terpineol synthase           | TPS-b |
| 46 | CsTPS46 | TEA020730.1 | Scaffold281:289297:2893962:+   | 243 | 732  | 3 | PF01397 / PF03936 | ATESY_VITVI, (-)-alpha-terpineol synthase           | TPS-b |
| 47 | CsTPS47 | TEA022294.1 | Scaffold881:746241:773646:-    | 547 | 1644 | 9 | PF01397 / PF03936 | ATESY_VITVI, (-)-alpha-terpineol synthase           | TPS-b |
| 48 | CsTPS48 | TEA014219.1 | Scaffold2428:561525:589292:+   | 558 | 1677 | 8 | PF01397 / PF03936 | ATESY_VITVI, (-)-alpha-terpineol synthase           | TPS-b |
| 49 | CsTPS49 | TEA023784.1 | Scaffold4432:595162:597357:-   | 303 | 912  | 4 | PF01397 / PF03936 | ATESY_VITVI, (-)-alpha-terpineol synthase           | TPS-b |
| 50 | CsTPS50 | TEA007029.1 | Scaffold4476:460151:468825:-   | 390 | 1173 | 5 | PF01397 / PF03936 | ATESY_VITVI, (-)-alpha-terpineol synthase           | TPS-b |
| 51 | CsTPS51 | TEA033306.1 | Scaffold596:223621:233875:+    | 528 | 1587 | 7 | PF01397 / PF03936 | TPS7_RICCO, Alpha-farnesene synthase                | TPS-b |
| 52 | CsTPS52 | TEA009170.1 | Scaffold1816:859236:866711:+   | 454 | 1365 | 7 | PF01397 / PF03936 | TPS7_RICCO, Alpha-farnesene synthase                | TPS-b |
| 53 | CsTPS53 | TEA026271.1 | Scaffold3165:1751525:1755140:- | 334 | 1005 | 5 | PF01397 / PF03936 | TPS7_RICCO, Alpha-farnesene synthase                | TPS-b |
| 54 | CsTPS54 | TEA012490.1 | Scaffold6781:57499:58656:-     | 188 | 567  | 2 | PF03936           | AFS1_MALDO, (E,E)-alpha-farnesene synthase          | TPS-b |
| 55 | CsTPS55 | TEA009866.1 | Scaffold4688:2601:3839:-       | 182 | 549  | 2 | PF03936           | AFS1_MALDO, (E,E)-alpha-farnesene synthase          | TPS-b |
| 56 | CsTPS56 | TEA004653.1 | Scaffold3940:666045:676363:+   | 136 | 411  | 2 | PF03936           | TPS7_RICCO, Alpha-farnesene synthase                | TPS-b |
| 57 | CsTPS57 | TEA004606.1 | Scaffold10585:153621:173467:-  | 521 | 1566 | 7 | PF01397 / PF03936 | SAUBS_SANAS, Beta-bisabolene synthase               | TPS-b |
| 58 | CsTPS58 | TEA031754.1 | Scaffold2326:935654:955868:+   | 560 | 1683 | 8 | PF01397 / PF03936 | SAUBS_SANAS, Beta-bisabolene synthase               | TPS-b |
| 59 | CsTPS59 | TEA026152.1 | Scaffold11662:400841:404486:+  | 188 | 567  | 3 | PF01397           | SAUBS_SANAS, Beta-bisabolene synthase               | TPS-b |
| 60 | CsTPS60 | TEA014989.1 | Scaffold5359:1062848:1075257:- | 451 | 1356 | 6 | PF01397 / PF03936 | TPS2_LOTJA, Tricyclene synthase EBOS, chloroplastic | TPS-b |
| 61 | CsTPS61 | TEA014996.1 | Scaffold5359:1134064:1143428:- | 371 | 1116 | 7 | PF01397 / PF03936 | TPS4_MEDTR, Tricyclene synthase TPS4, chloroplastic | TPS-b |
| 62 | CsTPS62 | TEA016812.1 | Scaffold4385:22190:22783:+     | 150 | 477  | 2 | PF03936           | TPS4_MEDTR, Tricyclene synthase TPS4, chloroplastic | TPS-b |
| 63 | CsTPS63 | TEA031457.1 | Scaffold1399:777225:788144:-   | 500 | 1500 | 7 | PF01397 / PF03936 | TPS12_RICCO, Probable terpene synthase 12           | TPS-b |

|    |         |             |                                |     |      |    |                   |                                                          |       |
|----|---------|-------------|--------------------------------|-----|------|----|-------------------|----------------------------------------------------------|-------|
| 64 | CsTPS64 | TEA031444.1 | Scaffold1399:767017:769790:-   | 430 | 1293 | 6  | PF03936           | ISPS_POPTM, Isoprene synthase, chloroplastic             | TPS-b |
| 65 | CsTPS65 | TEA031453.1 | Scaffold1399:675106:678765:-   | 398 | 1197 | 6  | PF01397 / PF03936 | ISPS_POPTM, Isoprene synthase, chloroplastic             | TPS-b |
| 66 | CsTPS66 | TEA020739.1 | Scaffold281:320490:329627:-    | 296 | 891  | 6  | PF01397 / PF03936 | ATESY_MAGGA, Alpha-terpineol synthase, chloroplastic     | TPS-b |
| 67 | CsTPS67 | TEA000496.1 | Scaffold682:1760053:1779446:+  | 723 | 2172 | 11 | PF01397 / PF03936 | KSA_PEA, Ent-copalyl diphosphate synthase, chloroplastic | TPS-c |
| 68 | CsTPS68 | TEA024173.1 | Scaffold2697:535837:540208:+   | 274 | 825  | 5  | PF03936           | KSB_ARATH, Ent-kaur-16-ene synthase, chloroplastic       | TPS-e |
| 69 | CsTPS69 | TEA017740.1 | Scaffold1561:239440:241090:-   | 297 | 894  | 6  | PF01397 / PF03936 | KSB_ARATH, Ent-kaur-16-ene synthase, chloroplastic       | TPS-e |
| 70 | CsTPS70 | TEA024176.1 | Scaffold2697:527999:534944:+   | 454 | 1365 | 7  | PF01397 / PF03936 | KSB_CUCMA, Ent-kaur-16-ene synthase, chloroplastic       | TPS-e |
| 71 | CsTPS71 | TEA008638.1 | Scaffold217:754423:765133:-    | 202 | 609  | 3  | PF03936           | KSB_CUCMA, Ent-kaur-16-ene synthase, chloroplastic       | TPS-e |
| 72 | CsTPS72 | TEA007033.1 | Scaffold4476:490748:497232:-   | 426 | 1281 | 9  | PF03936           | ATESY_VITVI, (-)-alpha-terpineol synthase                | TPS-e |
| 73 | CsTPS73 | TEA019347.1 | Scaffold1889:780853:787842:-   | 801 | 2430 | 13 | PF01397 / PF03936 | GES_ARATH, (E,E)-geranylinalool synthase                 | TPS-f |
| 74 | CsTPS74 | TEA005451.1 | Scaffold1133:280712:284333:-   | 565 | 1698 | 9  | PF01397 / PF03936 | GES_ARATH, (E,E)-geranylinalool synthase                 | TPS-f |
| 75 | CsTPS75 | TEA005162.1 | Scaffold5444:588299:592626:-   | 500 | 1503 | 7  | PF03936           | GES_ARATH, (E,E)-geranylinalool synthase                 | TPS-f |
| 76 | CsTPS76 | TEA007191.1 | Scaffold4183:109141:116548:-   | 557 | 1674 | 7  | PF01397 / PF03936 | NES1_FRAAN, (3S,6E)-nerolidol synthase 1                 | TPS-g |
| 77 | CsTPS77 | TEA004822.1 | Scaffold1497:1131549:1136588:+ | 557 | 1674 | 7  | PF01397 / PF03936 | NES1_FRAAN, (3S,6E)-nerolidol synthase 1                 | TPS-g |
| 78 | CsTPS78 | TEA019472.1 | Scaffold161:572157:579727:+    | 534 | 1605 | 7  | PF01397 / PF03936 | NES1_FRAAN, (3S,6E)-nerolidol synthase 1                 | TPS-g |
| 79 | CsTPS79 | TEA004657.1 | Scaffold3940:831501:836109:+   | 598 | 1797 | 7  | PF01397 / PF03936 | TPS13_RICCO, Probable terpene synthase 13                | TPS-g |
| 80 | CsTPS80 | TEA018721.1 | Scaffold3180:769431:773238:-   | 450 | 1356 | 7  | PF01397 / PF03936 | TPS13_RICCO, Probable terpene synthase 13                | TPS-g |

Supplementary Table S3. Identification of tea TPS gene family in CSA genome

| CSA |             |                       |                                                      |                 | Blast against CSS |                       |                    |                |                       |
|-----|-------------|-----------------------|------------------------------------------------------|-----------------|-------------------|-----------------------|--------------------|----------------|-----------------------|
| NO. | Gene ID     | Predicted protein(aa) | SWISS PROT(HMMER)                                    | Pfam            | Gene ID           | Predicted protein(aa) | Protein Similarity | CDS similarity | Coverage (nucleotide) |
| 1   | CSA000384.1 | 433                   | LINS_ARATH S-(+)-linalool synthase, chloroplastic    | PF03936         | TEA004657.1       | 598                   | 99%                | 99%            | 100%                  |
| 2   | CSA012738.1 | 103                   | TPSGD_VITVI, (-)-germacrene D synthase               | PF01397         | TEA029355.1       | 207                   | 100%               | 100%           | 91%                   |
| 3   | CSA009231.1 | 213                   | TPSGD_VITVI, (-)-germacrene D synthase               | PF01397         | TEA032539.1       | 567                   | 99%                | 99%            | 99%                   |
| 4*  | CSA006772.1 | 544                   | TPSGD_VITVI, (-)-germacrene D synthase               | PF03936/PF01397 | TEA014184.1       | 569                   | 99%                | 99%            | 93%                   |
| 5   | CSA019627.1 | 166                   | RLC1_CITSI, (R)-limonene synthase 1, chloroplastic   | PF01397         | TEA023157.1       | 500                   | 98%                | 98%            | 100%                  |
| 6   | CSA025505.1 | 250                   | VTSS2_HYOMU, Vetispiradiene synthase 2 (Fragment)    | PF03936         | TEA024081.1       | 541                   | 99%                | 99%            | 100%                  |
| 7   | CSA035357.1 | 147                   | TPSGD_VITVI, (-)-germacrene D synthase               | PF03936         | TEA010904.1       | 284                   | 99%                | 99%            | 100%                  |
| 8   | CSA018887.1 | 185                   | TPS10_RICCO, Terpene synthase 10                     | PF03936         | TEA020730.1       | 243                   | 99%                | 99%            | 96%                   |
| 9   | CSA019813.1 | 151                   | TPS12_RICCO, Probable terpene synthase 12            | PF03936         | TEA014989.1       | 451                   | 99%                | 99%            | 92%                   |
| 10  | CSA009230.1 | 166                   | TPSGD_VITVI, (-)-germacrene D synthase               | PF03936         | TEA032539.1       | 567                   | 98%                | 98%            | 100%                  |
| 11  | CSA022343.1 | 413                   | ATESY_VITVI, (-)-alpha-terpineol synthase            | PF03936/PF01397 | TEA009449.1       | 595                   | 98%                | 98%            | 100%                  |
| 12  | CSA026804.1 | 519                   | TPSGD_VITVI, (-)-germacrene D synthase               | PF03936/PF01397 | TEA012463.1       | 547                   | 98%                | 98%            | 100%                  |
| 13  | CSA016735.1 | 482                   | TPS13_RICCO, Probable terpene synthase 13            | PF03936/PF01397 | TEA004657.1       | 598                   | 98%                | 98%            | 100%                  |
| 14  | CSA018886.1 | 96                    | ATESY_VITVI, (-)-alpha-terpineol synthase            | PF01397         | TEA032731.1       | 583                   | 98%                | 98%            | 96%                   |
| 15  | CSA019812.1 | 130                   | ATESY_MAGGA, Alpha-terpineol synthase, chloroplastic | PF01397         | TEA014996.1       | 371                   | 98%                | 98%            | 92%                   |
| 16  | CSA005676.1 | 101                   | TPSGD_VITVI, (-)-germacrene D synthase               | PF03936         | TEA031966.1       | 441                   | 96%                | 96%            | 96%                   |
| 17  | CSA026262.1 | 84                    | LABER_LAVAN, Exo-alpha-bergamotene synthase          | PF01397         | TEA007033.1       | 426                   | 96%                | 96%            | 98%                   |
| 18  | CSA025571.1 | 213                   | TPSGD_VITVI, (-)-germacrene D synthase               | PF01397         | TEA029348.1       | 730                   | 95%                | 95%            | 99%                   |
| 19  | CSA025572.1 | 169                   | TPSGD_VITVI, (-)-germacrene D synthase               | PF03936         | TEA029356.1       | 537                   | 96%                | 96%            | 97%                   |
| 20  | CSA014761.1 | 63                    | ATESY_VITVI, (-)-alpha-terpineol synthase            | PF01397         | TEA030379.1       | 473                   | 93%                | 93%            | 100%                  |
| 21  | CSA020011.1 | 281                   | TPS9_RICCO, Probable terpene synthase 9              | PF03936/PF01397 | TEA014987.1       | 607                   | 99%                | 99%            | 97%                   |
| 22  | CSA018130.1 | 75                    | ISPS_POPCN, Isoprene synthase, chloroplastic         | PF01397         | TEA014989.1       | 451                   | 98%                | 98%            | 90%                   |
| 23  | CSA029044.1 | 238                   | NES1_FRAAN, (3S,6E)-nerolidol synthase 1             | PF01397         | TEA019472.1       | 534                   | 95%                | 95%            | 91%                   |
| 24  | CSA034089.1 | 411                   | TPSGD_VITVI, (-)-germacrene D synthase               | PF03936/PF01397 | TEA029356.1       | 537                   | 95%                | 95%            | 94%                   |
| 25  | CSA025246.1 | 127                   | ATESY_VITVI, (-)-alpha-terpineol synthase            | PF01397         | TEA030379.1       | 473                   | 95%                | 95%            | 91%                   |
| 26  | CSA005369.1 | 335                   | NES1_FRAAN, (3S,6E)-nerolidol synthase               | PF01397         | TEA004822.1       | 557                   | 98%                | 98%            | 90%                   |
| 27  | CSA008212.1 | 600                   | ATESY_VITVI, (-)-alpha-terpineol synthase            | PF03936/PF01397 | TEA030379.1       | 473                   | 95%                | 95%            | 99%                   |
| 28  | CSA005041.1 | 114                   | ATESY_VITVI, (-)-alpha-terpineol synthase            | PF01397         | TEA017654.1       | 153                   | 97%                | 97%            | 93%                   |
| 29  | CSA001660.1 | 366                   | ATESY_VITVI, (-)-alpha-terpineol synthase            | PF03936         | TEA009449.1       | 595                   | 84%                | 84%            | 100%                  |
| 30  | CSA001659.1 | 63                    | LABER_LAVAN, Exo-alpha-bergamotene synthase          | PF01397         | TEA030379.1       | 473                   | 99%                | 99%            | 88%                   |
| 31  | CSA003199.1 | 145                   | ATESY_VITVI, (-)-alpha-terpineol synthase            | PF01397         | TEA030379.1       | 473                   | 98%                | 98%            | 88%                   |

|         |             |     |                                                         |                 |             |     |      |      |     |     |
|---------|-------------|-----|---------------------------------------------------------|-----------------|-------------|-----|------|------|-----|-----|
| 32      | CSA033064.1 | 145 | ATESY_VITVI, (-)-alpha-terpineol synthase               | PF01397         | TEA030379.1 | 473 | 98%  | 98%  | 88% |     |
| 33      | CSA032703.1 | 157 | NES2_FRAAN, (3S,6E)-nerolidol synthase 2                | PF03936         | TEA007191.1 | 557 | 83%  | 83%  | 87% |     |
| 34      | CSA032320.1 | 140 | TPS10_RICCO, Terpene synthase 10                        | PF01397         | TEA017654.1 | 153 | 93%  | 93%  | 86% |     |
| 35      | CSA003009.1 | 223 | NES1_FRAAN, (3S,6E)-nerolidol synthase                  | PF03936         | TEA004657.1 | 598 | 91%  | 91%  | 85% |     |
| 36      | CSA014760.1 | 66  | LABER_LAVAN, Exo-alpha-bergamotene synthase             | PF01397         | TEA030379.1 | 473 | 99%  | 99%  | 84% |     |
| 37      | CSA032393.1 | 173 | ATESY_VITVI, (-)-alpha-terpineol synthase               | PF01397         | TEA007033.1 | 426 | 98%  | 98%  | 84% |     |
| 38      | CSA005131.1 | 165 | TPSGD_VITVI, (-)-germacrene D synthase                  | PF01397         | TEA032539.1 | 567 | 92%  | 92%  | 83% |     |
| 39      | CSA018895.1 | 296 | TPSGD_VITVI, (-)-germacrene D synthase                  | PF03936         | TEA029348.1 | 730 | 97%  | 97%  | 83% |     |
| 40      | CSA020936.1 | 502 | NES1_FRAAN, (3S,6E)-nerolidol synthase 1                | PF03936/PF01397 | TEA019472.1 | 534 | 99%  | 99%  | 83% |     |
| 41      | CSA005675.1 | 299 | TPSGD_VITVI, (-)-germacrene D synthase                  | PF03936         | TEA017888.1 | 373 | 99%  | 99%  | 82% |     |
| 42      | CSA033119.1 | 294 | ATESY_VITVI, (-)-alpha-terpineol synthase               | PF01397         | TEA030379.1 | 473 | 77%  | 77%  | 82% |     |
| 43      | CSA003008.1 | 229 | NES1_FRAAN, (3S,6E)-nerolidol synthase                  | PF01397         | TEA004657.1 | 598 | 99%  | 99%  | 80% |     |
| 44      | CSA012357.1 | 256 | NES1_FRAAN, (3S,6E)-nerolidol synthase 1                | PF03936         | TEA004657.1 | 598 | 98%  | 98%  | 78% |     |
| 45      | CSA030979.1 | 316 | ATESY_VITVI, (-)-alpha-terpineol synthase               | PF03936         | TEA007029.1 | 390 | 91%  | 91%  | 77% |     |
| 46      | CSA003485.1 | 99  | SPIBS_SANSP, Alpha-bisabolol synthase                   | PF01397         | TEA007033.1 | 426 | 97%  | 97%  | 76% |     |
| 47      | CSA029126.1 | 80  | ATESY_VITVI, (-)-alpha-terpineol synthase               | PF01397         | TEA002963.1 | 568 | 95%  | 95%  | 76% |     |
| 48      | CSA022871.1 | 108 | ATESY_VITVI, (-)-alpha-terpineol synthase               | PF01397         | TEA030379.1 | 473 | 92%  | 92%  | 75% |     |
| 49      | CSA014975.1 | 116 | LABER_LAVAN, Exo-alpha-bergamotene synthase             | PF01397         | TEA007033.1 | 426 | 96%  | 96%  | 73% |     |
| 50      | CSA019490.1 | 808 | NES1_FRAVE, (3S,6E)-nerolidol synthase 1, chloroplastic | PF03936/PF01397 | TEA004657.1 | 598 | 96%  | 96%  | 69% |     |
| 51      | CSA019811.1 | 98  | ISPS_POPTM, Isoprene synthase, chloroplastic            | PF01397         | TEA014989.1 | 451 | 100% | 100% | 69% |     |
| 52      | CSA004219.1 | 262 | TPSGD_VITVI, (-)-germacrene D synthase                  | PF01397         | TEA022784.1 | 385 | 100% | 100% | 68% |     |
| 53      | CSA036842.1 | 843 | KSA_PEA, Ent-copalyl diphosphate synthase               | PF03936/PF01397 | TEA000496.1 | 723 | 99%  | 99%  | 66% |     |
| 54      | CSA036823.1 | 513 | LIS_CLABR, S-linalool synthase                          | PF03936         | TEA005451.1 | 565 | 82%  | 82%  | 64% |     |
| 55      | CSA018888.1 | 169 | ATESY_VITVI, (-)-alpha-terpineol synthase               | PF03936         | TEA023784.1 | 303 | 98%  | 98%  | 59% |     |
| 56      | CSA022342.1 | 164 | ATESY_VITVI, (-)-alpha-terpineol synthase               | PF01397         | TEA009449.1 | 595 | 100% | 100% | 54% |     |
| 57      | CSA030850.1 | 138 | ATESY_VITVI, (-)-alpha-terpineol synthase               | PF01397         | TEA007033.1 | 426 | 94%  | 94%  | 52% |     |
| 58      | CSA029009.1 | 209 | TPSGD_VITVI, (-)-germacrene D synthase                  | PF03936         | TEA014184.1 | 569 | 98%  | 98%  | 49% |     |
| 59      | CSA011050.1 | 202 | TPS10_RICCO, Terpene synthase 10                        | PF01397         | TEA014219.1 | 558 | 99%  | 99%  | 48% |     |
| 60      | CSA004334.1 | 287 | TPSGD_VITVI, (-)-germacrene D synthase                  | PF03936/PF01397 | TEA021924.1 | 301 | 93%  | 93%  | 26% |     |
| Average |             |     |                                                         |                 |             |     |      | 96%  | 96% | 84% |

\*, the highlighted eight TPS genes from both "Yunkang10" and "Shu-Cha-Zao" share similar protein sequence length (90-110%), high identity at both cDNA and protein levels (>90%).



Supplementary Table S4. Identification of putative functional tea TPS gene

| Identified in genome |             |             |       |       |         |       | Verified in the full-length transcripts |                   |                                   |            |
|----------------------|-------------|-------------|-------|-------|---------|-------|-----------------------------------------|-------------------|-----------------------------------|------------|
| Name                 | Gene ID     | Protein(aa) | exons | DDXXD | NSE/DTE | RRX8W | Transcripts ID                          | coverage/identity | Reference                         | Annotation |
| CsTPS01              | TEA032539.1 | 567         | 7     | YES   | YES     | YES   | CssPBTTrans029702/PB.8683.1             | 1702/1704 (99%)   | Xia et al.,2019/ Qiao et al.,2019 | full       |
| CsTPS02              | TEA029356.1 | 537         | 7     | YES   | YES     | YES   | CssPBTTrans041118/PB.24310.30           | 1462/1480 (99%)   | Xia et al.,2019/ Qiao et al.,2019 | full       |
| CsTPS03              | TEA014184.1 | 569         | 7     | YES   | YES     | NO    | CssPBTTrans068400/PB.13101.1            | 1592/1593(99%)    | Xia et al.,2019/ Qiao et al.,2019 | full       |
| CsTPS04              | TEA031969.1 | 1042        | 8     | YES   | YES     | YES   | PB.31351.2                              | 1653/1682(98%)    | Qiao et al.,2019                  | full       |
| CsTPS05              | TEA031966.1 | 441         | 5     | NO    | NO      | NO    | PB.31351.8                              | 1281/1306(98%)    | Qiao et al.,2019                  | full       |
| CsTPS21              | TEA029348.1 | 730         | 10    | YES   | YES     | YES   | CssPBTTrans020115                       | 1645/1648 (99%)   | Xia et al.,2019                   | full       |
| CsTPS22              | TEA012463.1 | 547         | 7     | YES   | YES     | NO    | PB.22660.1                              | 1535/1571(98%)    | Qiao et al.,2019                  | full       |
| CsTPS23              | TEA023168.1 | 540         | 7     | YES   | YES     | YES   | CssPBTTrans024950                       | 1649/1649(100%)   | Xia et al.,2019                   | full       |
| CsTPS25              | TEA010551.1 | 839         | 7     | YES   | YES     | NO    | CssPBTTrans026737/PB.1889.1             | 1369/1397 (98%)   | Xia et al.,2019/ Qiao et al.,2019 | full       |
| CsTPS29              | TEA024081.1 | 541         | 7     | YES   | NO      | NO    | No hits found                           |                   |                                   | full       |
| CsTPS42              | TEA002963.1 | 568         | 7     | YES   | YES     | YES   | CssPBTTrans058925                       | 1704/1707 (99%)   | Xia et al.,2019                   | full       |
| CsTPS43              | TEA014987.1 | 607         | 7     | YES   | YES     | YES   | No hits found                           |                   |                                   | full       |
| CsTPS45              | TEA030379.1 | 473         | 6     | YES   | NO      | YES   | CssPBTTrans048789                       | 1098/1123 (98%)   | Xia et al.,2019                   | full       |
| CsTPS47              | TEA022294.1 | 547         | 8     | NO    | YES     | NO    | PB.21690.2                              | 1004/1007(99%)    | Qiao et al.,2019                  | full       |
| CsTPS51              | TEA033306.1 | 528         | 7     | YES   | YES     | NO    | PB.25018.1                              | 1251/1265(99%)    | Qiao et al.,2019                  | full       |
| CsTPS57              | TEA004606.1 | 521         | 7     | YES   | YES     | NO    | CssPBTTrans046146/PB.522.1              | 1517/1536 (99%)   | Xia et al.,2019/ Qiao et al.,2019 | full       |
| CsTPS63              | TEA031457.1 | 500         | 7     | YES   | YES     | NO    | PB.3574.1                               | 1494/1503(99%)    | Qiao et al.,2019                  | full       |
| CsTPS70              | TEA024176.1 | 454         | 7     | YES   | NO      | NO    | CssPBTTrans055745                       | 1290/1308(98%)    | Xia et al.,2019                   | full       |
| CsTPS73              | TEA019347.1 | 801         | 13    | YES   | NO      | NO    | No hits found                           |                   |                                   | full       |
| CsTPS76              | TEA007191.1 | 557         | 7     | YES   | YES     | NO    | PB.20489.1                              | 1517/1530 (99%)   | Qiao et al.,2019                  | full       |
| CsTPS77              | TEA004822.1 | 557         | 7     | YES   | YES     | NO    | PB.4391.1                               | 1528/1530 (99%)   | Qiao et al.,2019                  | full       |
| CsTPS78              | TEA019472.1 | 534         | 7     | YES   | YES     | NO    | PB.5304.3                               | 1538/1546(99%)    | Qiao et al.,2019                  | full       |
| CsTPS79              | TEA004657.1 | 598         | 7     | YES   | YES     | NO    | PB.19331.4                              | 1516/1547 (98%)   | Qiao et al.,2019                  | full       |

| Identified in genome |             |             |       |       |         |       | Verified in the full-length transcripts |                   |                                   |            |
|----------------------|-------------|-------------|-------|-------|---------|-------|-----------------------------------------|-------------------|-----------------------------------|------------|
| Name                 | Gene ID     | Protein(aa) | exons | DDXXD | NSE/DTE | RRX8W | Transcripts ID                          | coverage/identity | Reference                         | Annotation |
| CsTPS06              | TEA025177.1 | 624         | 9     | YES   | YES     | YES   | CssPBTTrans041118/PB.31351.8            | 1077/1145 (94%)   | Xia et al.,2019/ Qiao et al.,2019 | full?      |
| CsTPS07              | TEA010895.1 | 559         | 8     | YES   | YES     | NO    | CssPBTTrans041118/PB.24310.21           | 1287/1361 (95%)   | Xia et al.,2019/ Qiao et al.,2019 | full?      |
| CsTPS24              | TEA017886.1 | 527         | 7     | YES   | YES     | NO    | CssPBTTrans024950/PB.22660.1            | 1180/1230 (95%)   | Xia et al.,2019/ Qiao et al.,2019 | full?      |
| CsTPS37              | TEA009449.1 | 595         | 7     | YES   | YES     | NO    | CssPBTTrans048789                       | 1328/1555 (85%)   | Xia et al.,2019                   | full?      |
| CsTPS41              | TEA032709.1 | 599         | 8     | YES   | YES     | YES   | CssPBTTrans058925                       | 639/648 (99%)     | Xia et al.,2019                   | full?      |
| CsTPS44              | TEA032731.1 | 583         | 7     | YES   | NO      | NO    | CssPBTTrans058925                       | 639/648 (99%)     | Xia et al.,2019                   | full?      |

|         |             |     |    |     |     |    |                              |               |                                   |       |
|---------|-------------|-----|----|-----|-----|----|------------------------------|---------------|-----------------------------------|-------|
| CsTPS48 | TEA014219.1 | 558 | 8  | NO  | YES | NO | PB.21690.2                   | 585/599(98%)  | Qiao et al.,2019                  | full? |
| CsTPS58 | TEA031754.1 | 560 | 8  | YES | YES | NO | CssPBTTrans026173/PB.522.2   | 850/851 (99%) | Xia et al.,2019/ Qiao et al.,2019 | full? |
| CsTPS67 | TEA000496.1 | 723 | 11 | NO  | NO  | NO | CssPBTTrans065569/PB.30438.1 | 482/485 (99%) | Xia et al.,2019/ Qiao et al.,2019 | full? |

| Identified in genome |  |  |  | Verified in the full-length transcripts |  |  |  |  |  |  |  |
|----------------------|--|--|--|-----------------------------------------|--|--|--|--|--|--|--|
|----------------------|--|--|--|-----------------------------------------|--|--|--|--|--|--|--|

| Name    | Gene ID     | Protein(aa) | exons | DDXXD | NSE/DTE | RRX8W | Transcripts ID                | coverage/identity | Reference                         | Annotation |
|---------|-------------|-------------|-------|-------|---------|-------|-------------------------------|-------------------|-----------------------------------|------------|
| CsTPS08 | TEA005128.1 | 265         | 4     | NO    | NO      | NO    | CssPBTTrans029702/PB.24310.11 | 769/798 (96%)     | Xia et al.,2019/ Qiao et al.,2019 | partial    |
| CsTPS09 | TEA017888.1 | 373         | 5     | NO    | NO      | NO    | CssPBTTrans029702/PB.31351.8  | 683/741 (92%)     | Xia et al.,2019/ Qiao et al.,2019 | partial    |
| CsTPS10 | TEA032538.1 | 432         | 6     | YES   | NO      | NO    | CssPBTTrans057668/PB.24310.16 | 727/767 (95%)     | Xia et al.,2019/ Qiao et al.,2019 | partial    |
| CsTPS11 | TEA005117.1 | 195         | 1     | NO    | NO      | NO    | CssPBTTrans057668/PB.24310.21 | 353/355 (99%)     | Xia et al.,2019/ Qiao et al.,2019 | partial    |
| CsTPS12 | TEA022784.1 | 385         | 6     | NO    | NO      | NO    | CssPBTTrans033837/PB.13101.1  | 560/584 (96%)     | Xia et al.,2019/ Qiao et al.,2019 | partial    |
| CsTPS13 | TEA021924.1 | 301         | 6     | NO    | YES     | NO    | CssPBTTrans029702             | 280/313 (89%)     | Xia et al.,2019                   | partial    |
| CsTPS14 | TEA017878.1 | 280         | 3     | NO    | NO      | YES   | CssPBTTrans078631/PB.8683.4   | 367/378 (97%)     | Xia et al.,2019/ Qiao et al.,2019 | partial    |
| CsTPS15 | TEA002287.1 | 315         | 4     | YES   | NO      | YES   | CssPBTTrans049906/PB.24310.23 | 390/404 (97%)     | Xia et al.,2019/ Qiao et al.,2019 | partial    |
| CsTPS16 | TEA017309.1 | 207         | 3     | NO    | NO      | NO    | CssPBTTrans046143/PB.31351.8  | 523/601 (87%)     | Xia et al.,2019/ Qiao et al.,2019 | partial    |
| CsTPS17 | TEA033098.1 | 185         | 3     | NO    | NO      | NO    | CssPBTTrans070005/PB.18777.3  | 82/83 (99%)       | Xia et al.,2019/ Qiao et al.,2019 | partial    |
| CsTPS18 | TEA029355.1 | 207         | 2     | NO    | NO      | NO    | CssPBTTrans072461             | 273/286 (95%)     | Xia et al.,2019                   | partial    |
| CsTPS19 | TEA031961.1 | 186         | 2     | NO    | NO      | YES   | CssPBTTrans036197/PB.31351.2  | 402/434 (93%)     | Xia et al.,2019/ Qiao et al.,2019 | partial    |
| CsTPS20 | TEA029353.1 | 126         | 1     | NO    | NO      | NO    | CssPBTTrans072461/PB.24310.26 | 359/378 (95%)     | Xia et al.,2019/ Qiao et al.,2019 | partial    |
| CsTPS26 | TEA003774.1 | 367         | 5     | YES   | NO      | NO    | CssPBTTrans024950/PB.22660.1  | 797/817 (98%)     | Xia et al.,2019/ Qiao et al.,2019 | partial    |
| CsTPS27 | TEA005096.1 | 131         | 2     | NO    | NO      | NO    | CssPBTTrans026737/PB.22660.1  | 191/199 (96%)     | Xia et al.,2019/ Qiao et al.,2019 | partial    |
| CsTPS28 | TEA005082.1 | 399         | 6     | NO    | NO      | NO    | CssPBTTrans032981/PB.31165.4  | 643/677 (95%)     | Xia et al.,2019/ Qiao et al.,2019 | partial    |
| CsTPS30 | TEA007878.1 | 487         | 6     | NO    | NO      | NO    | CssPBTTrans032981             | 1081/1136 (95%)   | Xia et al.,2019                   | partial    |
| CsTPS31 | TEA027025.1 | 338         | 5     | NO    | NO      | YES   | CssPBTTrans024114/PB.24110.1  | 616/647 (95%)     | Xia et al.,2019/ Qiao et al.,2019 | partial    |
| CsTPS32 | TEA021499.1 | 435         | 7     | NO    | NO      | YES   | CssPBTTrans032981             | 396/398 (99%)     | Xia et al.,2019                   | partial    |
| CsTPS33 | TEA010904.1 | 285         | 5     | YES   | NO      | NO    | CssPBTTrans057668/PB.31351.9  | 309/322 (96%)     | Xia et al.,2019/ Qiao et al.,2019 | partial    |

|         |             |     |   |     |     |     |                              |                 |                                   |         |
|---------|-------------|-----|---|-----|-----|-----|------------------------------|-----------------|-----------------------------------|---------|
| CsTPS34 | TEA017307.1 | 223 | 3 | YES | NO  | NO  | CssPBTrans072461/PB.24310.26 | 313/329 (95%)   | Xia et al.,2019/ Qiao et al.,2019 | partial |
| CsTPS35 | TEA027070.1 | 186 | 5 | NO  | NO  | NO  | CssPBTrans024114             | 361/380 (95%)   | Xia et al.,2019                   | partial |
| CsTPS36 | TEA027061.1 | 174 | 3 | NO  | NO  | NO  | CssPBTrans032981/PB.4785.11  | 225/230 (98%)   | Xia et al.,2019/ Qiao et al.,2019 | partial |
| CsTPS38 | TEA023157.1 | 500 | 6 | YES | NO  | YES | No hits found                |                 |                                   | partial |
| CsTPS39 | TEA009450.1 | 236 | 3 | NO  | YES | YES | CssPBTrans058925             | 534/572 (93%)   | Xia et al.,2019                   | partial |
| CsTPS40 | TEA017654.1 | 153 | 3 | NO  | NO  | YES | CssPBTrans058211             | 266/319 (83%)   | Xia et al.,2019                   | partial |
| CsTPS46 | TEA020730.1 | 243 | 3 | YES | NO  | NO  | CssPBTrans048789/PB.21573.8  | 697/716 (97%)   | Xia et al.,2019/ Qiao et al.,2019 | partial |
| CsTPS49 | TEA023784.1 | 303 | 4 | YES | NO  | NO  | CssPBTrans052197/PB.21573.5  | 345/359 (96%)   | Xia et al.,2019/ Qiao et al.,2019 | partial |
| CsTPS50 | TEA007029.1 | 390 | 5 | NO  | YES | NO  | CssPBTrans035865/PB.22991.1  | 138/148 (93%)   | Xia et al.,2019/ Qiao et al.,2019 | partial |
| CsTPS52 | TEA009170.1 | 454 | 7 | YES | NO  | YES | PB.25018.1                   | 1326/1346 (98%) | Qiao et al.,2019                  | partial |
| CsTPS53 | TEA026271.1 | 334 | 5 | YES | NO  | NO  | PB.25018.1                   | 947/963 (98%)   | Qiao et al.,2019                  | partial |
| CsTPS54 | TEA012490.1 | 188 | 2 | NO  | YES | NO  | PB.7071.2                    | 548/550 (99%)   | Qiao et al.,2019                  | partial |
| CsTPS55 | TEA009866.1 | 182 | 2 | NO  | YES | NO  | PB.7071.1                    | 99/100 (99%)    | Qiao et al.,2019                  | partial |
| CsTPS56 | TEA004653.1 | 136 | 2 | NO  | YES | NO  | PB.7071.1                    | 262/262 (100%)  | Qiao et al.,2019                  | partial |
| CsTPS59 | TEA026152.1 | 188 | 3 | NO  | NO  | NO  | CssPBTrans072185/PB.1592.8   | 595/609 (98%)   | Xia et al.,2019/ Qiao et al.,2019 | partial |
| CsTPS60 | TEA014989.1 | 451 | 6 | YES | NO  | NO  | CssPBTrans026167/PB.23856.1  | 351/362 (97%)   | Xia et al.,2019/ Qiao et al.,2019 | partial |
| CsTPS61 | TEA014996.1 | 371 | 7 | YES | NO  | NO  | CssPBTrans026167             | 351/362 (97%)   | Xia et al.,2019                   | partial |
| CsTPS62 | TEA016812.1 | 150 | 2 | NO  | YES | NO  | PB.3574.1                    | 349/360 (96%)   | Qiao et al.,2019                  | partial |
| CsTPS64 | TEA031444.1 | 430 | 6 | YES | NO  | NO  | PB.3574.1                    | 475/505 (90%)   | Qiao et al.,2019                  | partial |
| CsTPS65 | TEA031453.1 | 398 | 6 | YES | NO  | NO  | No hits found                |                 |                                   | partial |
| CsTPS66 | TEA020739.1 | 296 | 6 | YES | NO  | NO  | CssPBTrans026167/PB.13892.1  | 322/333 (97%)   | Xia et al.,2019/ Qiao et al.,2019 | partial |
| CsTPS68 | TEA024173.1 | 274 | 5 | NO  | NO  | NO  | CssPBTrans038300/PB.13128.1  | 275/294 (94%)   | Xia et al.,2019/ Qiao et al.,2019 | partial |
| CsTPS69 | TEA017740.1 | 297 | 6 | YES | NO  | NO  | CssPBTrans056949/PB.13127.2  | 699/704 (99%)   | Xia et al.,2019/ Qiao et al.,2019 | partial |
| CsTPS71 | TEA008638.1 | 202 | 3 | NO  | NO  | NO  | CssPBTrans022223/PB.13127.7  | 419/425 (99%)   | Xia et al.,2019/ Qiao et al.,2019 | partial |
| CsTPS72 | TEA007033.1 | 426 | 9 | NO  | NO  | NO  | No hits found                |                 |                                   | partial |
| CsTPS74 | TEA005451.1 | 565 | 9 | NO  | YES | NO  | CssPBTrans050478/PB.24009.1  | 1646/1689 (97%) | Xia et al.,2019/ Qiao et al.,2019 | partial |
| CsTPS75 | TEA005162.1 | 500 | 7 | YES | YES | NO  | CssPBTrans050478/PB.24009.1  | 726/736 (99%)   | Xia et al.,2019/ Qiao et al.,2019 | partial |
| CsTPS80 | TEA018721.1 | 450 | 7 | NO  | YES | NO  | CssPBTrans038907/PB.19331.5  | 628/647 (97%)   | Xia et al.,2019/ Qiao et al.,2019 | partial |

Supplementary Table S5 Identification of transposable elements in tea TPS genes

| Name     | gene ID                        | Gene location                  | Transposon ID | Location                       | Class             | Number |
|----------|--------------------------------|--------------------------------|---------------|--------------------------------|-------------------|--------|
| CsTPS10  | TEA032538.1                    | Scaffold2014:1849901:1856947:- | TE311378      | Scaffold2014:1853913:1854085:- | LINE/L1           | 1      |
| CsTPS13  | TEA021924.1                    | Scaffold1039:738385:745242:+   | TE164009      | Scaffold1039:744626:744733:+   | LTR/Copia         | 1      |
| CsTPS24  | TEA017886.1                    | Scaffold5016:315868:326381:-   | TE546805      | Scaffold5016:318934:319633:-   | LTR/Copia         | 1      |
| CsTPS28  | TEA005082.1                    | Scaffold10509:51897:63536:-    | TE625680      | Scaffold10509:62665:63201:-    | LTR/Copia         | 1      |
| CsTPS35  | TEA027070.1                    | Scaffold228:1596311:1599132:-  | TE529858      | Scaffold228:1597128:1597212:-  | DNA/hAT           | 1      |
| CsTPS37  | TEA009449.1                    | Scaffold1786:1345647:1360438:- | TE273709      | Scaffold1786:1354512:1355716:- | LINE/L1           | 4      |
|          |                                |                                | TE273710      | Scaffold1786:1355117:1355781:- | LINE/L1           |        |
|          |                                |                                | TE273711      | Scaffold1786:1355956:1356223:- | LINE/L1           |        |
|          |                                |                                | TE273712      | Scaffold1786:1358305:1358729:- | LINE/L1           |        |
| CsTPS39  | TEA009450.1                    | Scaffold1786:1406070:1450966:- | TE273720      | Scaffold1786:1407859:1410112:- | LTR/Copia         | 11     |
|          |                                |                                | TE273721      | Scaffold1786:1400171:1412454:- | LTR/Copia         |        |
|          |                                |                                | TE273722      | Scaffold1786:1405810:1426929:- | LTR/Gypsy         |        |
|          |                                |                                | TE273723      | Scaffold1786:1407158:1428929:- | LTR/Gypsy         |        |
|          |                                |                                | TE273724      | Scaffold1786:1401045:1441905:- | LTR/Gypsy         |        |
|          |                                |                                | TE273725      | Scaffold1786:1401897:1442588:- | LTR/Gypsy         |        |
|          |                                |                                | TE273726      | Scaffold1786:1402899:1443119:- | LTR/Gypsy         |        |
|          |                                |                                | TE273727      | Scaffold1786:1403567:1444499:- | LTR/Gypsy         |        |
|          |                                |                                | TE273728      | Scaffold1786:1404517:1444957:- | LTR/Gypsy         |        |
|          |                                |                                | TE273729      | Scaffold1786:1405238:1445603:- | LTR/Gypsy         |        |
| TE273730 | Scaffold1786:1407440:1447470:- | LTR/Gypsy                      |               |                                |                   |        |
| CsTPS41  | TEA032709.1                    | Scaffold1618:391002:404626:+   | TE250880      | Scaffold1618:395563:398333:+   | LTR/Copia         | 1      |
| CsTPS44  | TEA032731.1                    | Scaffold1618:216308:232484:+   | TE250838      | Scaffold1618:220936:221017:+   | LTR/Copia         | 5      |
|          |                                |                                | TE250839      | Scaffold1618:221146:222249:+   | LTR/Copia         |        |
|          |                                |                                | TE250840      | Scaffold1618:222352:222567:+   | LTR/Copia         |        |
|          |                                |                                | TE250841      | Scaffold1618:222394:222565:+   | LTR/Copia         |        |
|          |                                |                                | TE250842      | Scaffold1618:222593:224090:+   | LTR/Copia         |        |
| CsTPS48  | TEA014219.1                    | Scaffold2428:561525:589292:+   | TE359549      | Scaffold2428:577278:577358:+   | LTR/Copia         | 4      |
|          |                                |                                | TE359550      | Scaffold2428:577884:577986:+   | LTR/Copia         |        |
|          |                                |                                | TE359551      | Scaffold2428:578397:579225:+   | LTR/Copia         |        |
|          |                                |                                | TE359552      | Scaffold2428:579654:581275:+   | LTR/Copia         |        |
| CsTPS50  | TEA007029.1                    | Scaffold4476:460151:468825:-   | TE522179      | Scaffold4476:466233:466387:-   | LTR/Gypsy         | 1      |
| CsTPS53  | TEA026271.1                    | Scaffold3165:1751525:1755140:- | TE429535      | Scaffold3165:1754459:1754549:- | DNA/PIF-Harbinger | 1      |
| CsTPS57  | TEA004606.1                    | Scaffold10585:153621:173467:-  | TE626080      | Scaffold10585:157007:157243:-  | LINE/L1           | 1      |
| CsTPS58  | TEA031754.1                    | Scaffold2326:935654:955868:+   | TE348377      | Scaffold2326:951961:952698:+   | LINE/L1           | 2      |
|          |                                |                                | TE348378      | Scaffold2326:953063:953147:+   | LINE/L1           |        |
| CsTPS60  | TEA014989.1                    | Scaffold5359:1062848:1075257:- | TE554481      | Scaffold5359:1063890:1065716:- | LTR/Copia         | 4      |
|          |                                |                                | TE554482      | Scaffold5359:1066183:1066496:- | LTR/Copia         |        |
|          |                                |                                | TE554483      | Scaffold5359:1066771:1066902:- | LTR/Copia         |        |
|          |                                |                                | TE554484      | Scaffold5359:1067345:1067448:- | LTR/Copia         |        |
| CsTPS63  | TEA031457.1                    | Scaffold1399:777225:788144:-   | TE214393      | Scaffold1399:785957:786101:-   | LTR/Copia         | 1      |

|         |             |                               |          |                               |                   |   |
|---------|-------------|-------------------------------|----------|-------------------------------|-------------------|---|
| CsTPS67 | TEA000496.1 | Scaffold682:1760053:1779446:+ | TE089287 | Scaffold682:1760606:1761229:+ | LTR/Gypsy         | 3 |
|         |             |                               | TE089288 | Scaffold682:1761433:1762666:+ | LTR/Gypsy         |   |
|         |             |                               | TE089289 | Scaffold682:1763042:1763096:+ | LTR/Gypsy         |   |
| CsTPS70 | TEA024176.1 | Scaffold2697:527999:534944:+  | TE389462 | Scaffold2697:530047:533222:+  | LINE/RTE-<br>BovB | 1 |
| CsTPS72 | TEA007033.1 | Scaffold4476:490748:497232:-  | TE522189 | Scaffold4476:496274:496317:-  | LINE/L1           | 1 |

---

Supplementary Table S6 TPM value of tea TPS genes in transcriptome of eight tea organs

| Name    | Gene ID     | Apical bud | Young leaf | Mature leaf | Old leaf  | Stem      | Flower    | Fruit     | Root      |
|---------|-------------|------------|------------|-------------|-----------|-----------|-----------|-----------|-----------|
| CsTPS01 | TEA032539   | 31.3278    | 23.1825    | 0.918775    | 0.12187   | 5.48689   | 42.9248   | 0.0639724 | 0.127303  |
| CsTPS02 | TEA029356   | 77.7795    | 79.3262    | 1.30856     | 0.043525  | 2.30623   | 0.903892  | 0.0274167 | 0.019585  |
| CsTPS03 | TEA014184   | 0.149306   | 1.89402    | 4.79805     | 0         | 0.115311  | 0.0602595 | 0.438668  | 0.019585  |
| CsTPS04 | TEA031969   | 10.2933    | 7.82464    | 0.49187     | 0.0870501 | 0.586166  | 22.3462   | 0.630585  | 0.11751   |
| CsTPS05 | TEA031966   | 0          | 0.0257107  | 0.3341      | 0.05223   | 1.05702   | 1.91826   | 0.776807  | 0         |
| CsTPS06 | TEA025177   | 0.500613   | 0.591347   | 0.0185611   | 0         | 0.124921  | 0         | 0.0182778 | 0         |
| CsTPS07 | TEA010895   | 1.83558    | 1.33696    | 0.139208    | 0         | 0.0480464 | 0.080346  | 0         | 0         |
| CsTPS08 | TEA005128   | 0.0263481  | 0.0514215  | 0           | 0         | 0         | 10.3445   | 0.0913891 | 0.0587551 |
| CsTPS09 | TEA017888.1 |            |            |             |           |           |           |           |           |
| CsTPS10 | TEA032538   | 0          | 0          | 0           | 0         | 0         | 0         | 0         | 0.0293775 |
| CsTPS11 | TEA005117   | 28.6843    | 30.9557    | 2.58928     | 0         | 0.701477  | 0.150649  | 0.0822502 | 0.0783401 |
| CsTPS12 | TEA022784   | 0.0263481  | 0.068562   | 0.0742445   | 0         | 0         | 0         | 0         | 0.0293775 |
| CsTPS13 | TEA021924.1 | 0          | 0          | 0           | 0         | 0         | 0         | 0         | 0         |
| CsTPS14 | TEA017878   | 21.7547    | 17.329     | 0.872372    | 0         | 0.509291  | 0.100432  | 0.0548335 | 0         |
| CsTPS15 | TEA002287   | 0.0878269  | 0.454223   | 0           | 0.10446   | 0.0960927 | 0.080346  | 0.1645    | 0         |
| CsTPS16 | TEA017309.1 | 0          | 0          | 0           | 0         | 0         | 0         | 0         | 0         |
| CsTPS17 | TEA033098   | 3.22325    | 2.35682    | 4.50107     | 2.41129   | 4.09355   | 5.34301   | 4.79793   | 2.03684   |
| CsTPS18 | TEA029355   | 44.9586    | 16.9605    | 1.03942     | 0.0783451 | 0.836007  | 0.974195  | 0         | 0.0783401 |
| CsTPS19 | TEA031961   | 0.0878269  | 1.01986    | 0.204172    | 0         | 0.201795  | 0.451946  | 0.146223  | 0         |
| CsTPS20 | TEA029353   | 12.6734    | 13.5838    | 0           | 0         | 0.643821  | 2.4606    | 0         | 0         |
| CsTPS21 | TEA029348   | 4.11908    | 5.63922    | 0.194892    | 0.0783451 | 0.52851   | 322.228   | 0.173639  | 1.51784   |
| CsTPS22 | TEA012463   | 0.237133   | 0.171405   | 0.603236    | 0.957551  | 0.595775  | 0.0703027 | 0.219334  | 0         |
| CsTPS23 | TEA023168   | 0.307394   | 0.0428512  | 3.18323     | 8.07825   | 5.06409   | 1.31567   | 0.703696  | 0         |
| CsTPS24 | TEA017886   | 0.149306   | 0.111413   | 0.0742445   | 0.391725  | 0.192185  | 0.040173  | 0.155361  | 0.019585  |
| CsTPS25 | TEA010551   | 0.245915   | 0.145694   | 0           | 0.03482   | 0         | 0         | 0         | 0         |
| CsTPS26 | TEA003774   | 0          | 0          | 0           | 0.774746  | 0         | 0         | 0         | 0         |
| CsTPS27 | TEA005096.1 | 0          | 0          | 0           | 0         | 0         | 0         | 0         | 0         |
| CsTPS28 | TEA005082   | 0.0614788  | 0          | 0           | 0         | 0         | 2.55098   | 0         | 0.0293775 |
| CsTPS29 | TEA024081   | 0          | 0          | 0           | 0         | 0.0480464 | 23.7222   | 0         | 0.303568  |
| CsTPS30 | TEA007878   | 0          | 0.0257107  | 0           | 0         | 0         | 11.3589   | 0.0274167 | 0.0293775 |
| CsTPS31 | TEA027025   | 0          | 0          | 0           | 0         | 0         | 22.2759   | 0         | 0.15668   |
| CsTPS32 | TEA021499   | 0          | 0.0257107  | 0           | 0         | 0.0576556 | 17.3447   | 0.0274167 | 0.0979251 |
| CsTPS33 | TEA010904.1 | 0          | 0          | 0           | 0         | 0         | 0         | 0         | 0         |
| CsTPS34 | TEA017307   | 0.254698   | 0.0171405  | 0           | 0         | 0.0768742 | 0.0602595 | 0         | 0         |
| CsTPS35 | TEA027070   | 0          | 0          | 0           | 0         | 0         | 1.84796   | 0         | 0         |
| CsTPS36 | TEA027061   | 0          | 0          | 0           | 0         | 0         | 67.2596   | 0.109667  | 0.881326  |
| CsTPS37 | TEA009449   | 0.0526961  | 0.582777   | 1.47561     | 0.757336  | 0.230623  | 0.0200865 | 0.0456945 | 1.79203   |
| CsTPS38 | TEA023157   | 0          | 0          | 0           | 0         | 0         | 0.0703027 | 0         | 1.6941    |
| CsTPS39 | TEA009450   | 0          | 0          | 0.0742445   | 0         | 4.29534   | 0         | 8.01482   | 0         |
| CsTPS40 | TEA017654   | 0.237133   | 0          | 0           | 0         | 0         | 0         | 0         | 0         |

|         |             |          |           |           |          |           |           |           |           |
|---------|-------------|----------|-----------|-----------|----------|-----------|-----------|-----------|-----------|
| CsTPS41 | TEA032709   | 0        | 0         | 0         | 0        | 0.66304   | 0         | 0.237612  | 1.08697   |
| CsTPS42 | TEA002963   | 0        | 0         | 0.0278417 | 0        | 0.201795  | 0         | 1.06925   | 3.11402   |
| CsTPS43 | TEA014987   | 2.44159  | 0.557066  | 5.98596   | 0        | 21.4479   | 3.62561   | 0.0182778 | 0.176265  |
| CsTPS44 | TEA032731   | 0        | 0         | 0         | 0        | 0.0480464 | 0         | 0.0822502 | 0.146888  |
| CsTPS45 | TEA030379   | 1.12418  | 12.0155   | 34.6072   | 21.5101  | 3.99746   | 0.100432  | 1.08753   | 4.72978   |
| CsTPS46 | TEA020730   | 2.45915  | 27.7333   | 84.351    | 57.2528  | 8.85975   | 0.451946  | 0.42039   | 0.949874  |
| CsTPS47 | TEA022294   | 0.974878 | 0.137124  | 0         | 0.01741  | 0.211404  | 0.190822  | 0         | 0.421078  |
| CsTPS48 | TEA014219   | 0.632353 | 0.0942727 | 0         | 0        | 0.182576  | 0.160692  | 0         | 0.23502   |
| CsTPS49 | TEA023784   | 0.904617 | 7.79035   | 13.6981   | 11.6212  | 1.78732   | 0.331427  | 0.0456945 | 0.0489626 |
| CsTPS50 | TEA007029   | 0.509396 | 0.325669  | 0         | 0        | 0.144139  | 0.522249  | 0         | 0.323153  |
| CsTPS51 | TEA033306   | 4.44404  | 1.85974   | 4.48251   | 0        | 1.9699    | 0         | 5.82149   | 0         |
| CsTPS52 | TEA009170   | 3.23203  | 1.1227    | 1.82827   | 0        | 0.52851   | 0.0301297 | 1.87348   | 0         |
| CsTPS53 | TEA026271   | 1.67749  | 0.265678  | 0         | 0        | 0.211404  | 0         | 0         | 0         |
| CsTPS54 | TEA012490   | 16.8188  | 6.71907   | 16.3895   | 0        | 1.13389   | 0         | 10.985    | 0         |
| CsTPS55 | TEA009866   | 10.1177  | 3.48809   | 5.79107   | 0        | 4.68932   | 0         | 8.91958   | 0         |
| CsTPS56 | TEA004653   | 0.755311 | 1.21698   | 0         | 0        | 0         | 0         | 0         | 0         |
| CsTPS57 | TEA004606   | 104.347  | 50.2216   | 2.32942   | 0.45266  | 30.0001   | 2.35012   | 11.6795   | 0.949874  |
| CsTPS58 | TEA031754   | 19.6205  | 6.04202   | 0.389783  | 0.05223  | 9.0135    | 0.944065  | 9.2303    | 0.166473  |
| CsTPS59 | TEA026152   | 20.3758  | 7.13902   | 0.714603  | 0.1741   | 13.6644   | 1.01437   | 8.06966   | 0.254605  |
| CsTPS60 | TEA014989   | 7.32476  | 5.75921   | 3.71222   | 4.97926  | 1.84498   | 1.4864    | 1.10581   | 0.0783401 |
| CsTPS61 | TEA014996   | 0.500613 | 0.617058  | 0.937336  | 0        | 0.249841  | 0         | 0.137084  | 0         |
| CsTPS62 | TEA016812   | 0.219567 | 0.128554  | 0         | 0        | 0         | 0         | 0         | 0         |
| CsTPS63 | TEA031457   | 6.92954  | 5.72493   | 0.0278417 | 0.026115 | 0         | 0         | 0         | 0         |
| CsTPS64 | TEA031444   | 0.606005 | 0.35995   | 0.250575  | 0.15669  | 0.288278  | 0.160692  | 0.246751  | 0.11751   |
| CsTPS65 | TEA031453.1 | 0        | 0         | 0         | 0        | 0         | 0         | 0         | 0         |
| CsTPS66 | TEA020739   | 0.13174  | 0.111413  | 0         | 0        | 0.0960927 | 0         | 0         | 0         |
| CsTPS67 | TEA000496   | 28.008   | 33.0726   | 0.380503  | 0.12187  | 12.0692   | 0.100432  | 0.0365556 | 5.20962   |
| CsTPS68 | TEA024173   | 0.711398 | 0.462793  | 0.631078  | 0.29597  | 0.778351  | 0.331427  | 0.594029  | 0.401493  |
| CsTPS69 | TEA017740   | 5.18179  | 4.58508   | 6.5892    | 3.37754  | 6.77454   | 2.93263   | 9.3491    | 5.15086   |
| CsTPS70 | TEA024176   | 3.09151  | 3.05101   | 4.19481   | 2.10661  | 5.46768   | 3.32432   | 7.50305   | 4.20099   |
| CsTPS71 | TEA008638   | 7.6585   | 7.00189   | 9.51257   | 5.17948  | 11.5792   | 4.4592    | 16.2398   | 7.91235   |
| CsTPS72 | TEA007033   | 0.58844  | 0.145694  | 0         | 0        | 0.153748  | 0         | 0.0913891 | 0.293775  |
| CsTPS73 | TEA019347   | 0        | 0         | 0         | 0        | 0         | 0         | 0.0456945 | 0         |
| CsTPS74 | TEA005451   | 1.09784  | 1.44837   | 3.60086   | 0.01741  | 1.22999   | 21.8642   | 0         | 0.137095  |
| CsTPS75 | TEA005162   | 2.71385  | 2.75105   | 9.46617   | 0.026115 | 3.68035   | 28.9848   | 0.0274167 | 0.254605  |
| CsTPS76 | TEA007191   | 21.4034  | 41.4543   | 4.39898   | 1.01849  | 2.26779   | 16.7923   | 0         | 0.0881326 |
| CsTPS77 | TEA004822   | 27.3844  | 55.1753   | 7.99984   | 2.91618  | 4.78542   | 2.57107   | 0.0639724 | 0.146888  |
| CsTPS78 | TEA019472   | 3.53942  | 3.24812   | 0.278417  | 0.513595 | 5.41002   | 119.635   | 0.0822502 | 0.519003  |
| CsTPS79 | TEA004657   | 69.6028  | 41.8485   | 3.97208   | 5.15336  | 19.2762   | 1378.65   | 12.301    | 7.53044   |
| CsTPS80 | TEA018721   | 2.90707  | 3.53951   | 1.11367   | 0.609351 | 0         | 14.0605   | 0         | 0.35253   |

---

Supplementary Fig S1. The structure analysis of *CsTPS67* with three retrotransposons inserted in the first intron. (A), loss of 89 amino acids of *CsTPS67* due to the insertion of retrotransposons compared to other *CPS* genes identified in GenBank (B); Phylogenetic analysis of *CsTPS67* with *CPS* genes of other species.

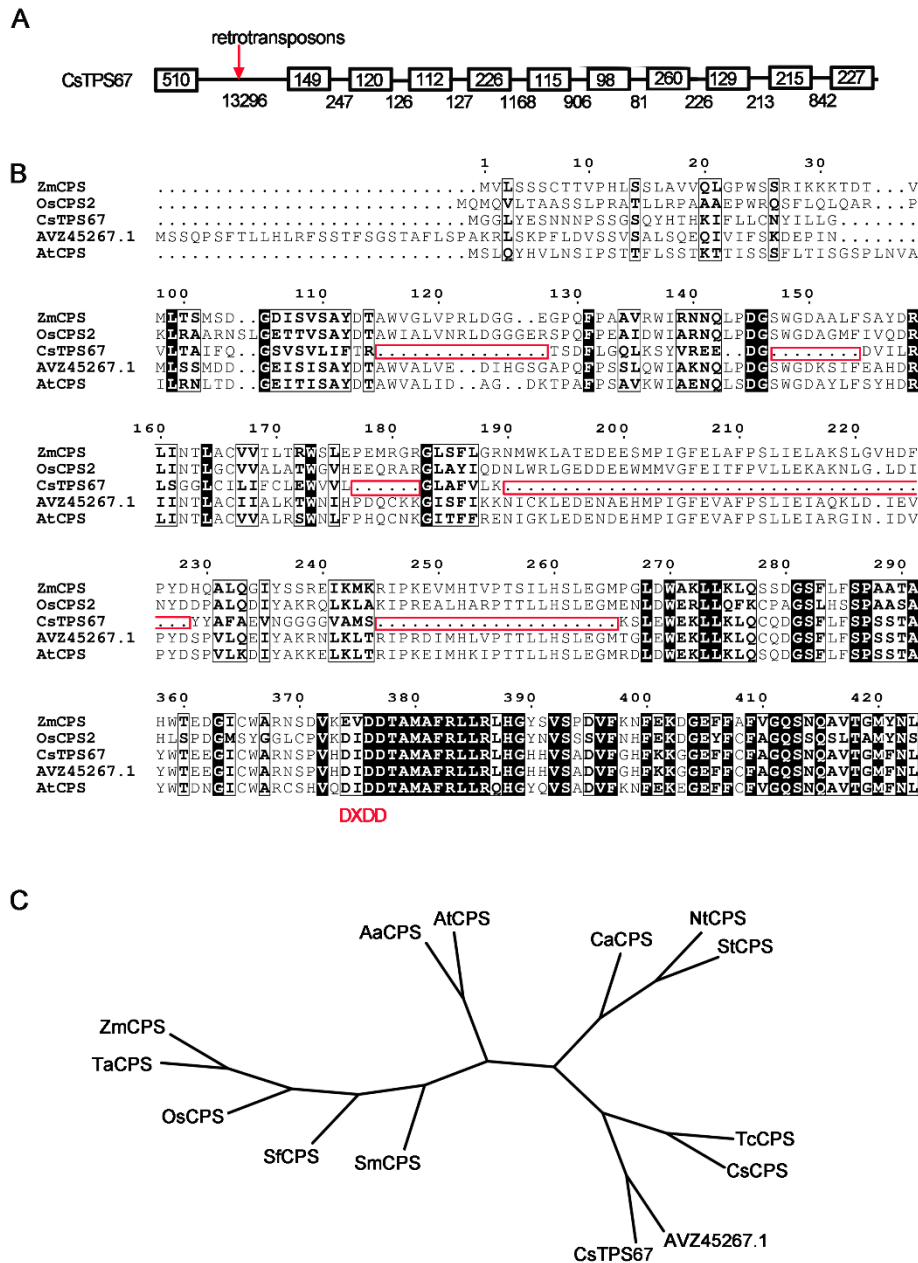

Fig S1



Supplementary Fig S2. Tempo-spatial expression patterns of 80 *CsTPS* genes in tea apical buds (B), young leaves (YL), mature leaves (ML), old leaves (OL), immature stems (S), flowers (FL), young fruits (FR) and roots (R).

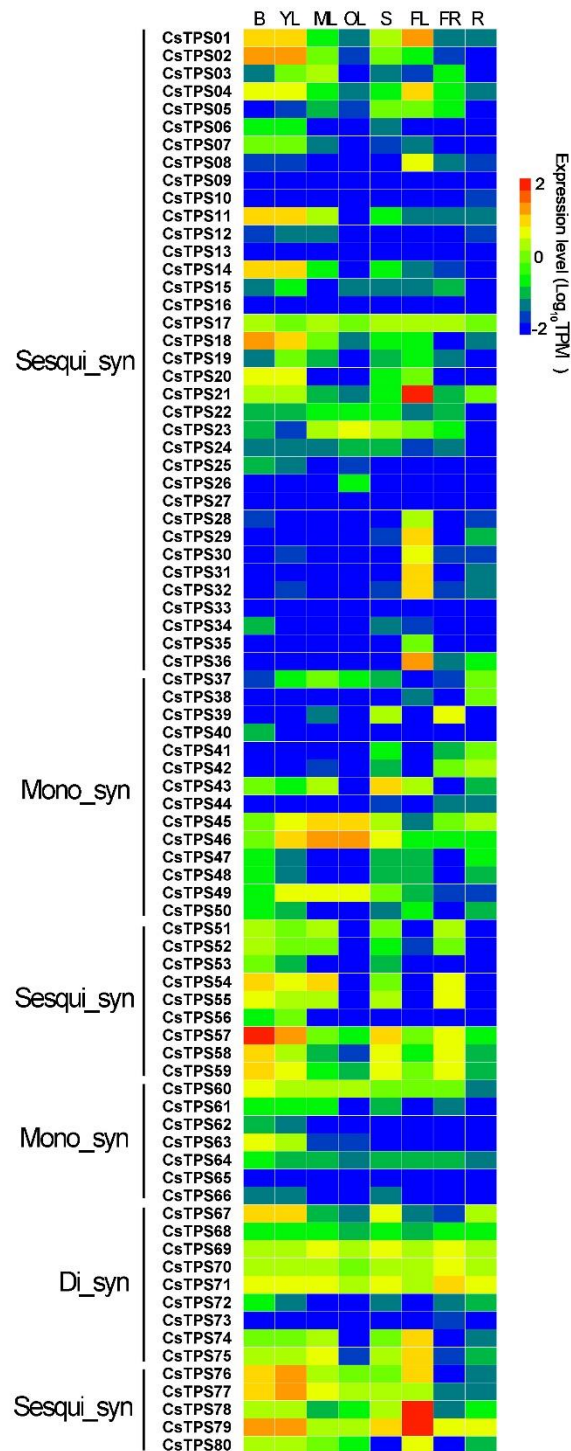

Fig S2
